# Supplementary material
Source: MDPI journal article supplement (https://www.mdpi.com/2305-7084/7/6/115)
Supplement: s1 [file s1]

## Supplementary File

**Table S1:** XRD-analysis data of the ZrO<sub>2</sub> and Pt/ZrO<sub>2</sub> nanocatalysts

| No. | ZrO <sub>2</sub> |               | 0.5 wt% Pt/ZrO <sub>2</sub> |              | 1 wt% Pt/ZrO <sub>2</sub> |               |
|-----|------------------|---------------|-----------------------------|--------------|---------------------------|---------------|
|     | 2θ °             | Intensity     | 2θ °                        | Intensity    | 2θ °                      | Intensity     |
| 1   | 20.632420        | 24.40         | 20.594530                   | 25.33        | 20.440750                 | 9.14          |
| 2   | 24.371590        | 17.44         | 24.295030                   | 16.96        | 24.520900                 | 14.81         |
| 3   | 28.276290        | 100           | 28.234250                   | 100          | 28.264510                 | 100           |
| 4   | 34.299830        | 28.13         | 34.227920                   | 24.80        | 34.421460                 | 21.12         |
| 5   | 38.642940        | 16.56         | 38.599360                   | 8.65         | 38.654860                 | 7.80          |
| 6   | 41.281790        | 13.22         | 41.289720                   | 8.46         | 41.534310                 | 7.85          |
| 7   | 45.856970        | 12.45         | 45.594860                   | 14.24        | 45.533080                 | 8.38          |
| 8   | 49.326140        | 27.16         | 49.305130                   | 22.63        | 49.285860                 | 22.43         |
| 9   | 54.237780        | 16.93         | 54.168660                   | 19.97        | 54.163740                 | 16.73         |
| 10  | 55.505320        | 27.26         | 55.507510                   | 19.57        | 55.426540                 | 19.00         |
| 11  | 58.190300        | 11.20         | 58.161950                   | 9.56         | 58.043670                 | 7.33          |
| 12  | 61.499650        | 12.36         | 61.389670                   | 12.30        | 61.447950                 | 6.48          |
| 13  | 62.907620        | 17.09         | 62.823380                   | 12.83        | 62.870870                 | 11.94         |
| 14  | 65.703330        | 14.47         | 65.766820                   | 9.46         | 65.662670                 | 9.02          |
| 15  | 71.339770        | 8.78          | 71.240100                   | 6.34         | 71.271010                 | 5.29          |
|     | <b>SUM</b>       | <b>347.45</b> | <b>SUM</b>                  | <b>311.1</b> | <b>SUM</b>                | <b>267.32</b> |
|     | <b>(DOC)%</b>    | <b>100%</b>   |                             | <b>89.5%</b> |                           | <b>79.9%</b>  |

**Table S2:** XRD-analysis data of the SZrO<sub>2</sub> and Pt/SZrO<sub>2</sub> nanocatalysts

| No. | SZrO <sub>2</sub> |           | 0.5 wt% Pt/SZrO <sub>2</sub> |           | 1 wt% Pt/SZrO <sub>2</sub> |           |
|-----|-------------------|-----------|------------------------------|-----------|----------------------------|-----------|
|     | 2θ °              | Intensity | 2θ °                         | Intensity | 2θ °                       | Intensity |
| 1   | 24.049160         | 18.28     | 24.085230                    | 17.52     | 24.156820                  | 15.10     |
| 2   | 28.177570         | 100       | 28.251610                    | 100.00    | 28.265540                  | 100.00    |
| 3   | 34.148120         | 24.79     | 34.245500                    | 24.99     | 34.202390                  | 25.07     |
| 4   | 41.235990         | 8.36      | 41.364850                    | 7.20      | 41.343630                  | 7.22      |
| 5   | 44.699050         | 7.77      | 44.921810                    | 8.32      | 44.906120                  | 7.25      |
| 6   | 50.104440         | 29.88     | 50.231340                    | 28.17     | 50.273270                  | 26.66     |
| 7   | 50.593820         | 15.42     | 50.547020                    | 14.71     | 50.692590                  | 13.40     |
| 8   | 51.163780         | 9.9       | 51.350230                    | 7.59      | 51.304950                  | 6.93      |

|           |               |              |               |               |               |               |
|-----------|---------------|--------------|---------------|---------------|---------------|---------------|
| <b>9</b>  | 54.059890     | 13.74        | 54.149630     | 12.10         | 54.144640     | 12.91         |
| <b>10</b> | 55.479570     | 18.43        | 55.463620     | 17.86         | 55.462510     | 16.57         |
| <b>11</b> | 55.877770     | 9.95         | 55.947630     | 7.59          | 55.826600     | 10.99         |
| <b>12</b> | 58.087560     | 6.16         | 58.004750     | 5.72          | 58.132920     | 5.20          |
| <b>13</b> | 59.913040     | 15.54        | 59.928960     | 13.87         | 59.971200     | 14.11         |
| <b>14</b> | 64.208120     | 3.63         | 64.274880     | 3.54          | 64.315220     | 2.77          |
| <b>15</b> | 71.246970     | 7.65         | 71.265600     | 5.14          | 71.279510     | 5.43          |
|           | <b>SUM</b>    | <b>289.5</b> | <b>SUM</b>    | <b>274.32</b> | <b>SUM</b>    | <b>269.61</b> |
|           | <b>(DOC)%</b> | <b>100%</b>  | <b>(DOC)%</b> | <b>94.75%</b> | <b>(DOC)%</b> | <b>93.13%</b> |
